# Supplementary material
Source: PubMed Central journal article supplement (PMC9530019)
Supplement: NIHMS1832674-supplement-Supplemental_Material.pdf [file NIHMS1832674-supplement-Supplemental_Material.pdf]

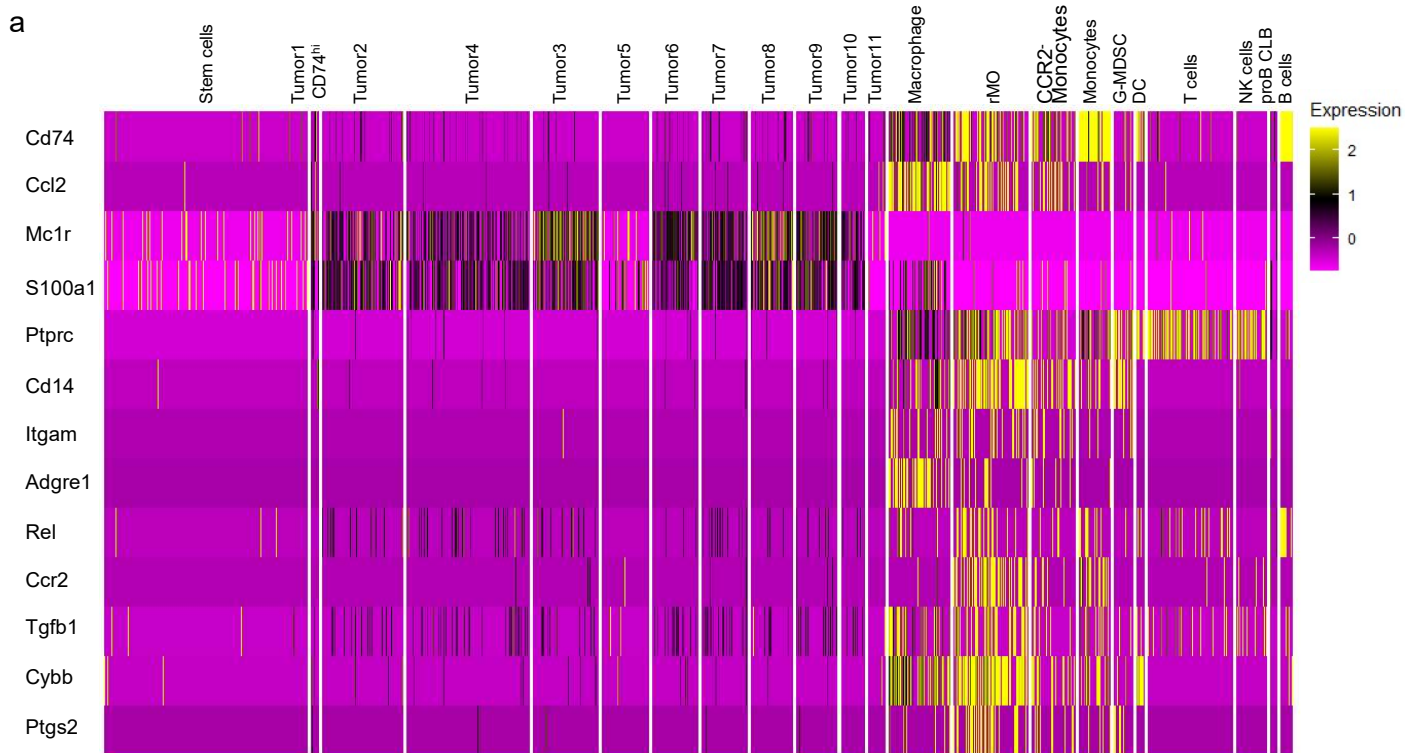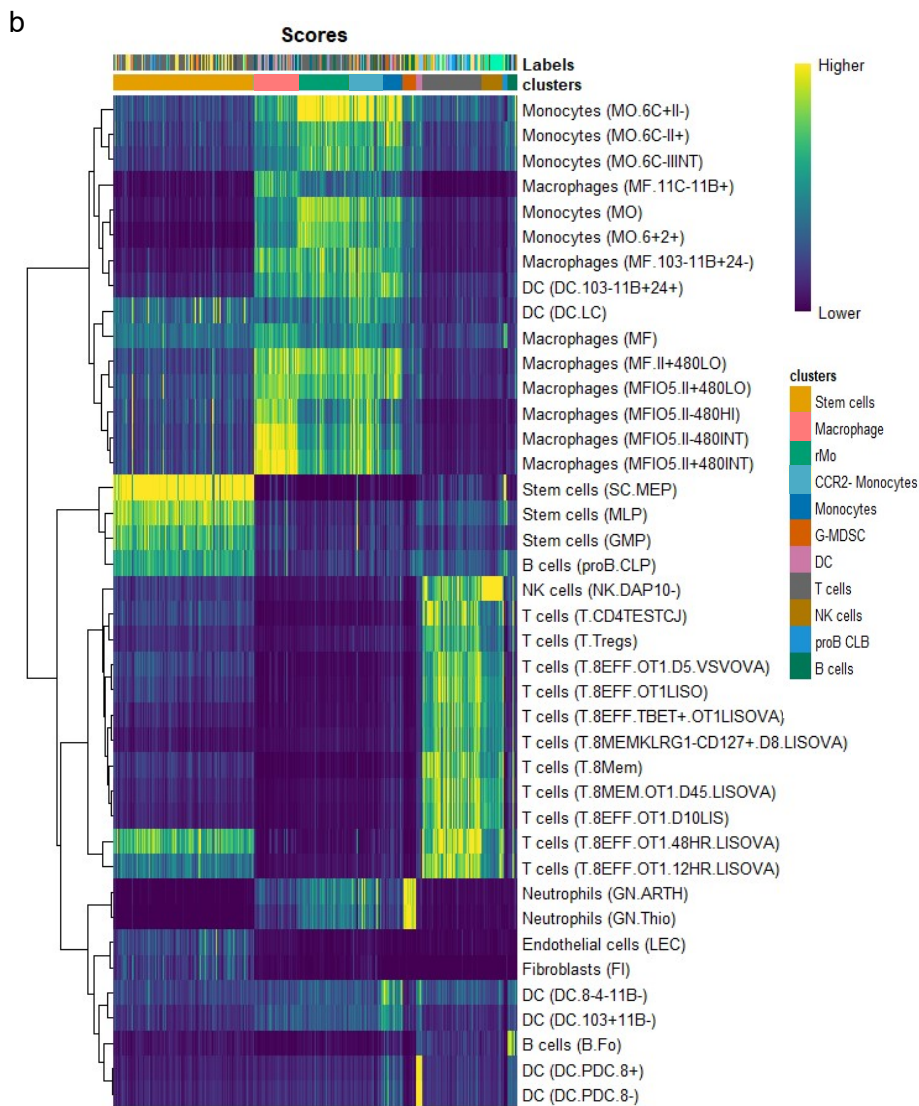

Supplementary Figure 1

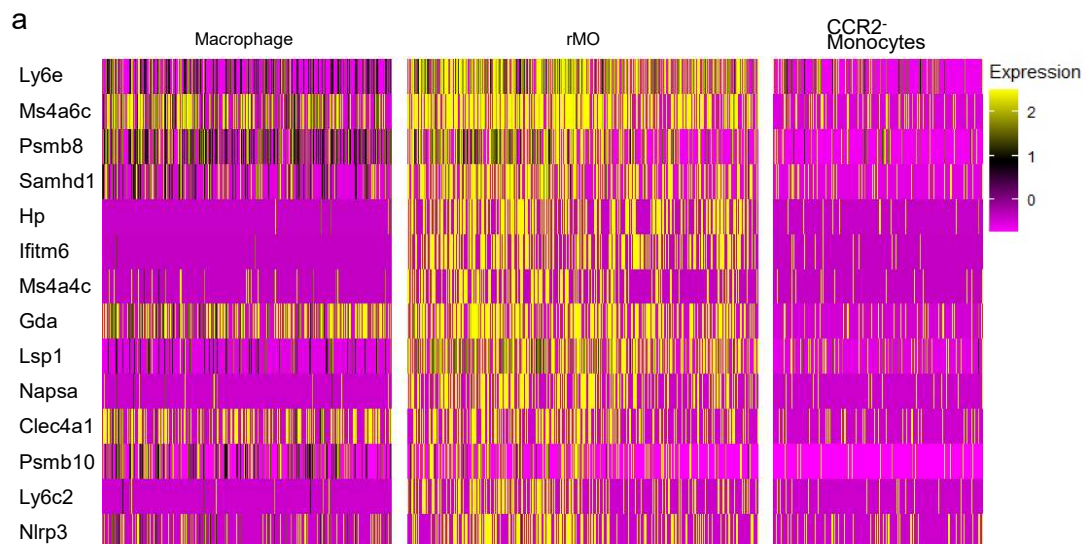

**b**

| id | source | term_id    | term_name                              | term_size | p_value |
|----|--------|------------|----------------------------------------|-----------|---------|
| 1  | GO:BP  | GO:0034097 | response to cytokine                   | 959       | 1.0e-05 |
| 2  | GO:BP  | GO:0071345 | cellular response to cytokine stimulus | 841       | 2.2e-06 |
| 3  | GO:BP  | GO:0032635 | interleukin-6 production               | 174       | 2.5e-04 |
| 4  | KEGG   | KEGG:04062 | Chemokine signaling pathway            | 193       | 9.9e-04 |
| 5  | WP     | WP:WP151   | IL-5 Signaling Pathway                 | 67        | 5.0e-06 |
| 6  | WP     | WP:WP2292  | Chemokine signaling pathway            | 180       | 6.0e-04 |

**c**

| id | source | term_id           | term_name                                       | term_size | p_value |
|----|--------|-------------------|-------------------------------------------------|-----------|---------|
| 1  | GO:BP  | GO:0002376        | immune system process                           | 2743      | 2.5e-20 |
| 2  | GO:BP  | GO:0006955        | immune response                                 | 1705      | 1.4e-17 |
| 3  | GO:BP  | GO:0009605        | response to external stimulus                   | 2953      | 1.9e-17 |
| 4  | GO:BP  | GO:0034097        | response to cytokine                            | 959       | 7.9e-17 |
| 5  | GO:BP  | GO:0006952        | defense response                                | 1722      | 2.5e-20 |
| 6  | GO:BP  | GO:0070887        | cellular response to chemical stimulus          | 3105      | 1.1e-18 |
| 7  | GO:BP  | GO:0071345        | cellular response to cytokine stimulus          | 841       | 7.0e-18 |
| 8  | GO:BP  | GO:0006954        | inflammatory response                           | 756       | 3.0e-15 |
| 9  | GO:BP  | GO:0048584        | positive regulation of response to stimulus     | 2304      | 1.8e-14 |
| 10 | GO:BP  | GO:1901701        | cellular response to oxygen-containing compound | 1245      | 3.7e-12 |
| 11 | GO:BP  | GO:0072593        | reactive oxygen species metabolic process       | 285       | 3.3e-11 |
| 12 | REAC   | REAC-R-MMU-168256 | Immune System                                   | 1737      | 4.3e-13 |

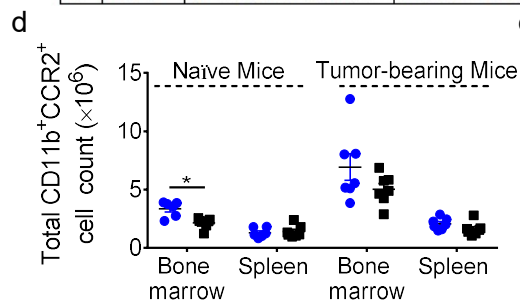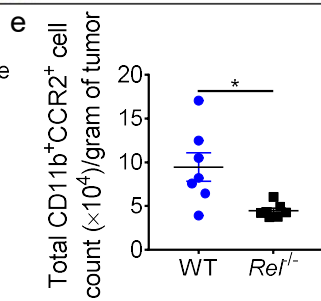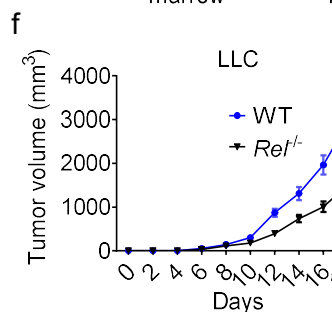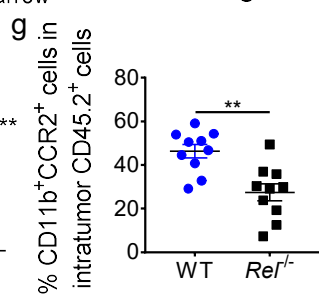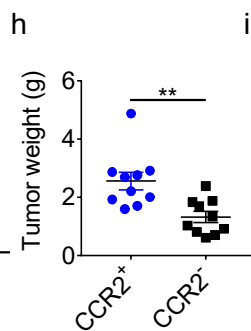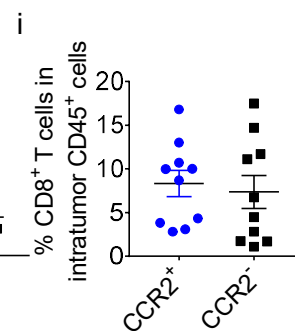

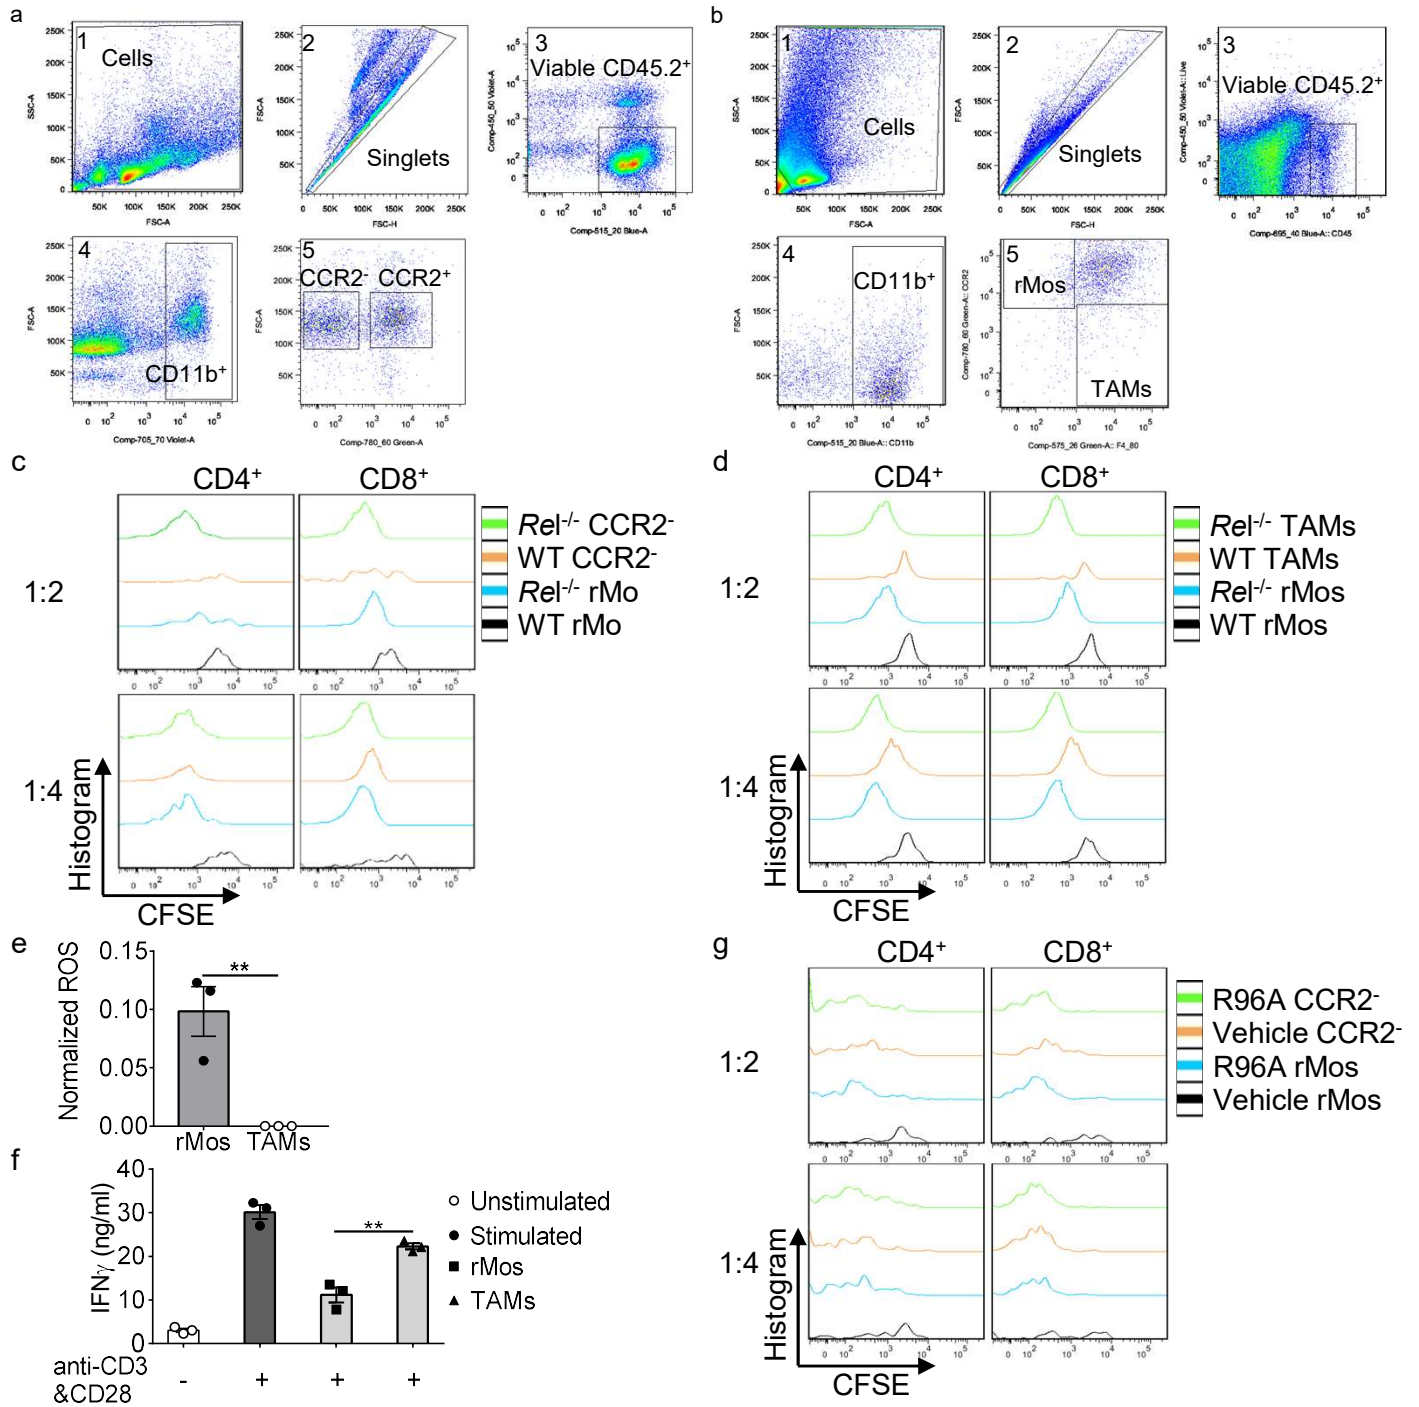

Supplementary Figure 3

a

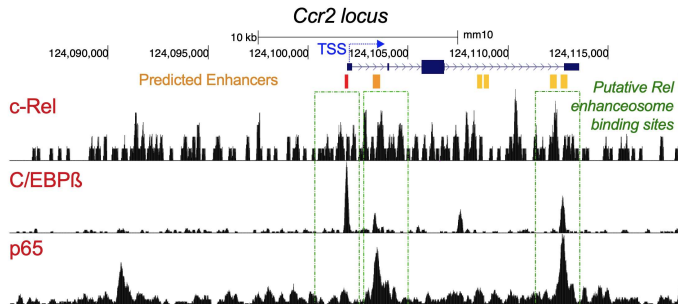

b

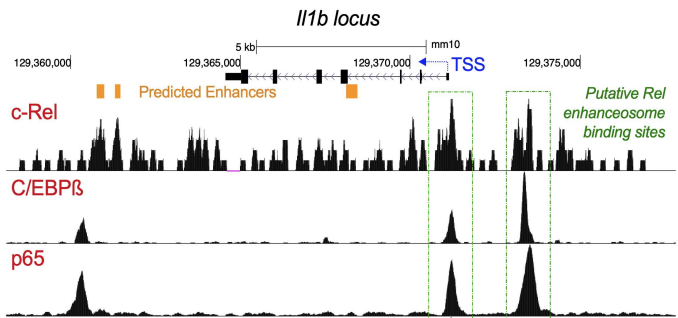

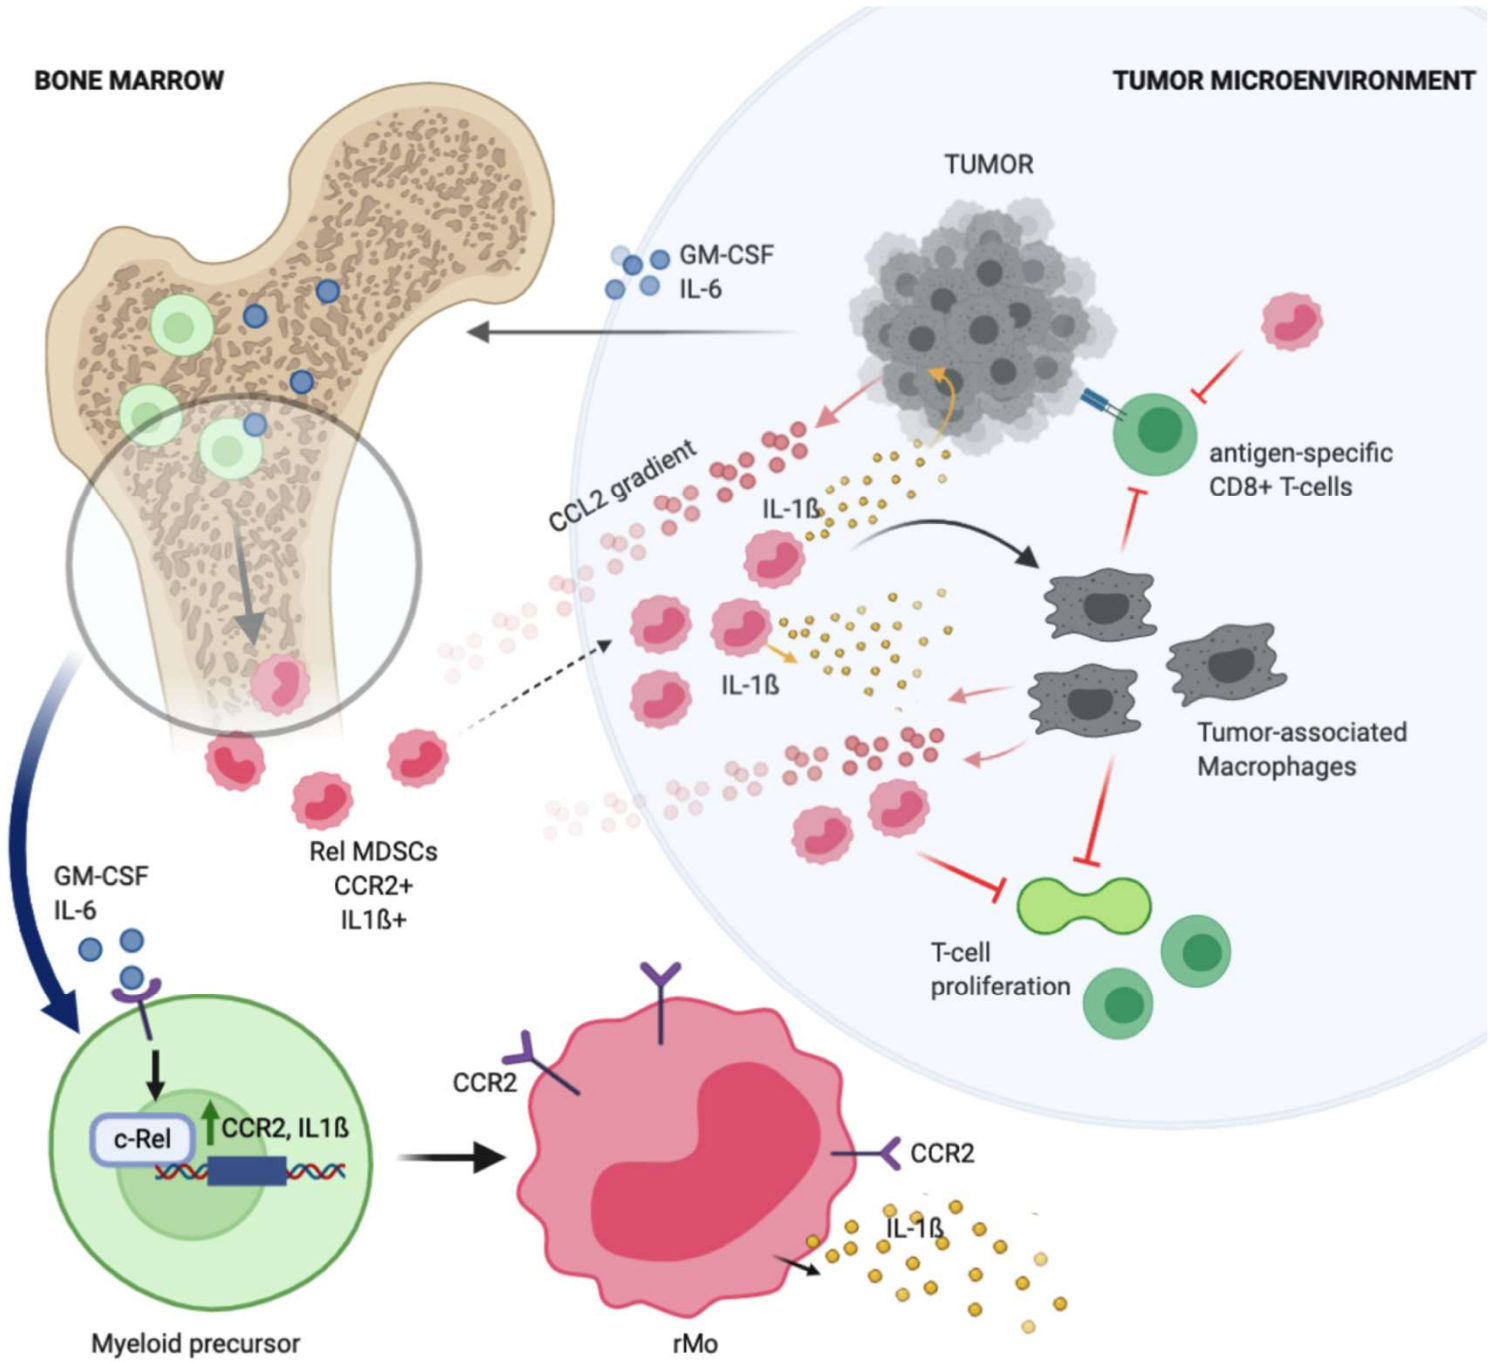

Supplementary Figure 5

Supplementary Table 1: Primer used for target detection

| Primer           | sequence (5' >3')       |
|------------------|-------------------------|
| IL1b(Fwd)        | GGTGTGTGACGTTCCCATTA    |
| IL1b(Rev)        | ATTGAGGTGGAGAGCTTTCAG   |
| Ccr2 (Fwd)       | TCCACTCTACTCCCTGGTATTC  |
| Ccr2 (Rev)       | TGGCCAAGTTGAGCAGATAG    |
| Ccl2(Fwd)        | GTCCTGTCATGCTTCTGG      |
| Ccl2(Rev)        | GCTCTCCAGCCTACTCATTG    |
| Cd74(Fwd)        | CCCAGAGAATCTGAAGCATCTTA |
| Cd74(Rev)        | CAGGGAGTTCTTGCTCATCTC   |
| Il1rap (Fwd)     | CCACCAAGGTACACAGTAGAAC  |
| Il1rap (Rev)     | GACCATCTCCAGCCAGTAAAC   |
| IL1r1(Fwd)       | TGAGGAATGTGGCTGAAGAG    |
| IL1r1(Rev)       | ACTCGTGTGACCGGATATTG    |
| human-CCR2 (Fwd) | CGAAACGAGAAGAAGAGGCATAG |
| human-CCR2 (Rev) | CTGGAAGGTGTTTCAGGAGAATG |
| human-IL1B (Fwd) | ATGGACAAGCTGAGGAAGATG   |
| human-IL1B (Rev) | CCCATGTGTCTGAAGAAGATAGG |
